# Supplementary material
Source: ML conference proceedings conference paper supplement (https://openreview.net/forum?id=2mDquK2qMI)
Supplement: supplementary_material [file supplementary.pdf › FlowFit_supplementary/supplementary.pdf]

---

# One Step Diffusion via Flow Fitting

---

Anonymous Author(s)

Affiliation

Address

email

Table 1: Performance comparison of various training paradigms applied to a unified model architecture (**DiT-B**) on the class-conditioned ImageNet-256 dataset. FID-50k scores are reported for different denoising schedules: 128-step, 4-step, and single-step. Lower scores denote better fidelity. Our method, FlowFit, produces high-quality outputs in a single forward pass, reducing the performance gap with methods utilizing multi-stage distillation. Parentheses indicate out-of-distribution evaluations.

|                                         | ImageNet-256 (Class-Conditional) |             |             |
|-----------------------------------------|----------------------------------|-------------|-------------|
|                                         | 128-Step                         | 4-Step      | 1-Step      |
| <b>Two phase training</b>               |                                  |             |             |
| Progressive Distillation                | (201.9)                          | (142.5)     | <b>35.6</b> |
| Consistency Distillation                | 132.8                            | 98.01       | 136.5       |
| Reflow                                  | <b>16.9</b>                      | <b>32.8</b> | 44.8        |
| <b>End-to-end (single training run)</b> |                                  |             |             |
| Diffusion                               | 39.7                             | (464.5)     | (467.2)     |
| Flow Matching                           | 17.3                             | (108.2)     | (324.8)     |
| Consistency Training                    | 42.8                             | 43.0        | 69.7        |
| Live Reflow (ours)                      | 46.3                             | 95.8        | 58.1        |
| Shortcut Models                         | <b>15.5</b>                      | <b>28.3</b> | 40.3        |
| FlowFit (ours)                          | -                                | -           | <b>34.4</b> |

1 A key question in FlowFit is whether the proposed basis expansion reliably approximates the target  
2 flow. The following proposition confirms that this is indeed the case.

3 **Proposition 1** (Universal Approximation of Flow Trajectories). *Let  $\psi : (\mathbb{R}^d \times [0, 1]) \rightarrow \mathbb{R}^d$  be a*  
4 *continuous trajectory from an initial point  $x_0$  to a target point  $x_1$ . Then, for any  $\varepsilon > 0$ , there exists*  
5 *a sufficiently large integer  $N > 0$ , a set of basis functions  $\{\gamma(t)\}_{i=1}^N$ , and coefficients  $\{W_i(x)\}_{i=1}^N$*   
6 *such that*

$$\left\| \psi(x, t) - \left( \sum_{i=1}^N \gamma_i(t) \cdot W_i(x) \right) \right\| < \varepsilon, \quad \forall t \in [0, 1].$$

7 *Proof.* The results is immediately obtained by applying the Stone–Weierstrass theorem [2, 1], and  
8 because  $\mathbb{R}^d$  and  $[0, 1]$  are both locally compact Hausdorff spaces, and the basis functions and the  
9 coefficients are all continuous.  $\square$

## 10 1 Evaluation of Class-Conditional Generation on ImageNet-256

11 Table 1 showcases the performance of various generative learning objectives under class-conditioning  
12 on ImageNet-256. Our proposed approach, FlowFit, attains strong performance in the single-step  
13 regime, surpassing the end-to-end counterparts. For ImageNet experiments, we use the classifier-free  
14 guidance (CFG) [3] is employed to enhance conditional generation.

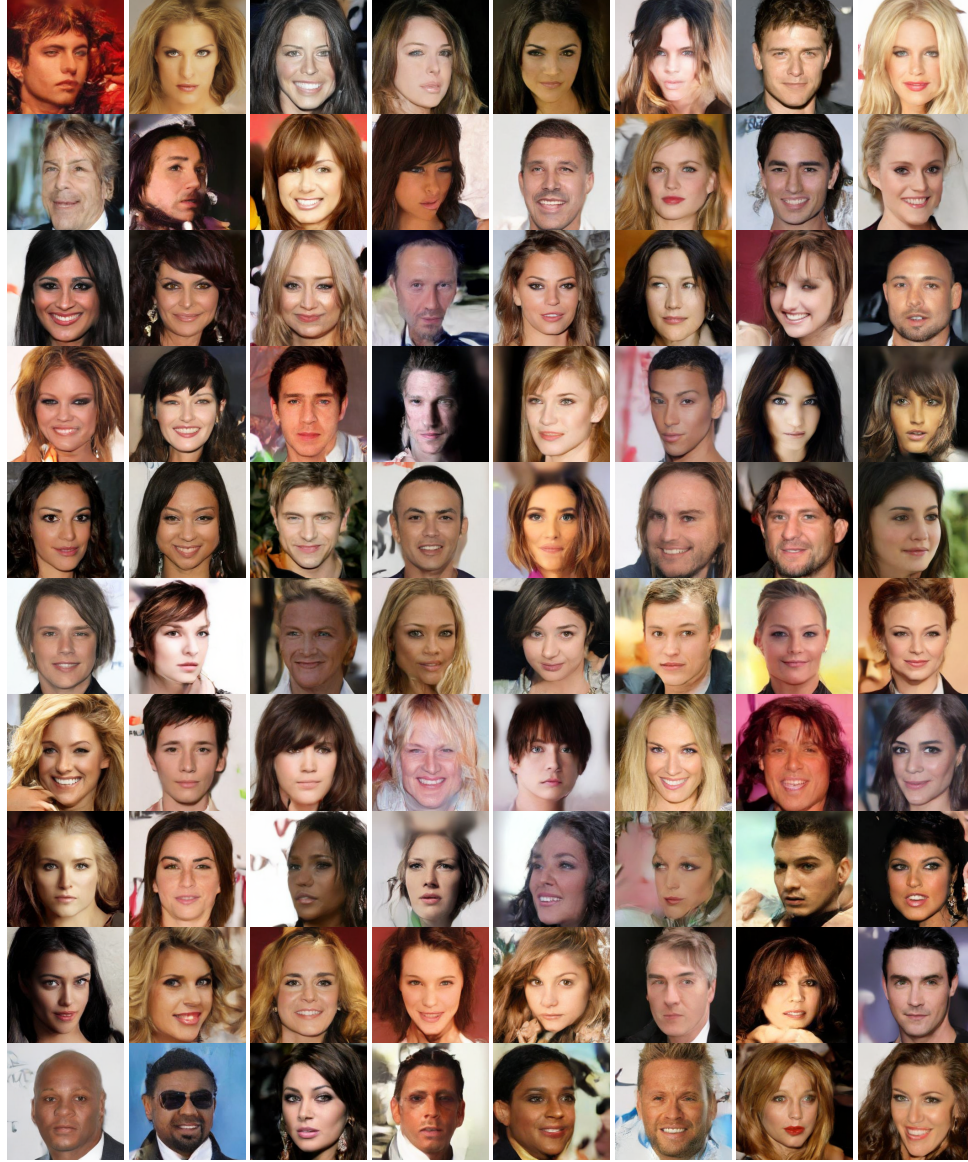

Figure 1: Unfiltered samples generated on the unconditional CelebA-HQ dataset at a resolution of  $256 \times 256$ . These images were produced in a single forward pass using a DiT-B model trained for 400,000 iterations.

## 2 Qualitative Samples

Figures 1 and 2 present sample outputs from models trained on CelebA-HQ (unconditional) and ImageNet (class-conditioned), respectively, using our proposed training procedure.

## 3 Implementation Details

Detailed training configurations and hyperparameters corresponding to the results presented in the main text (Table 1) and supplementary (Table 1) are provided in Table 2.

## References

- [1] Errett Bishop. A generalization of the stone-weierstrass theorem. 1961.

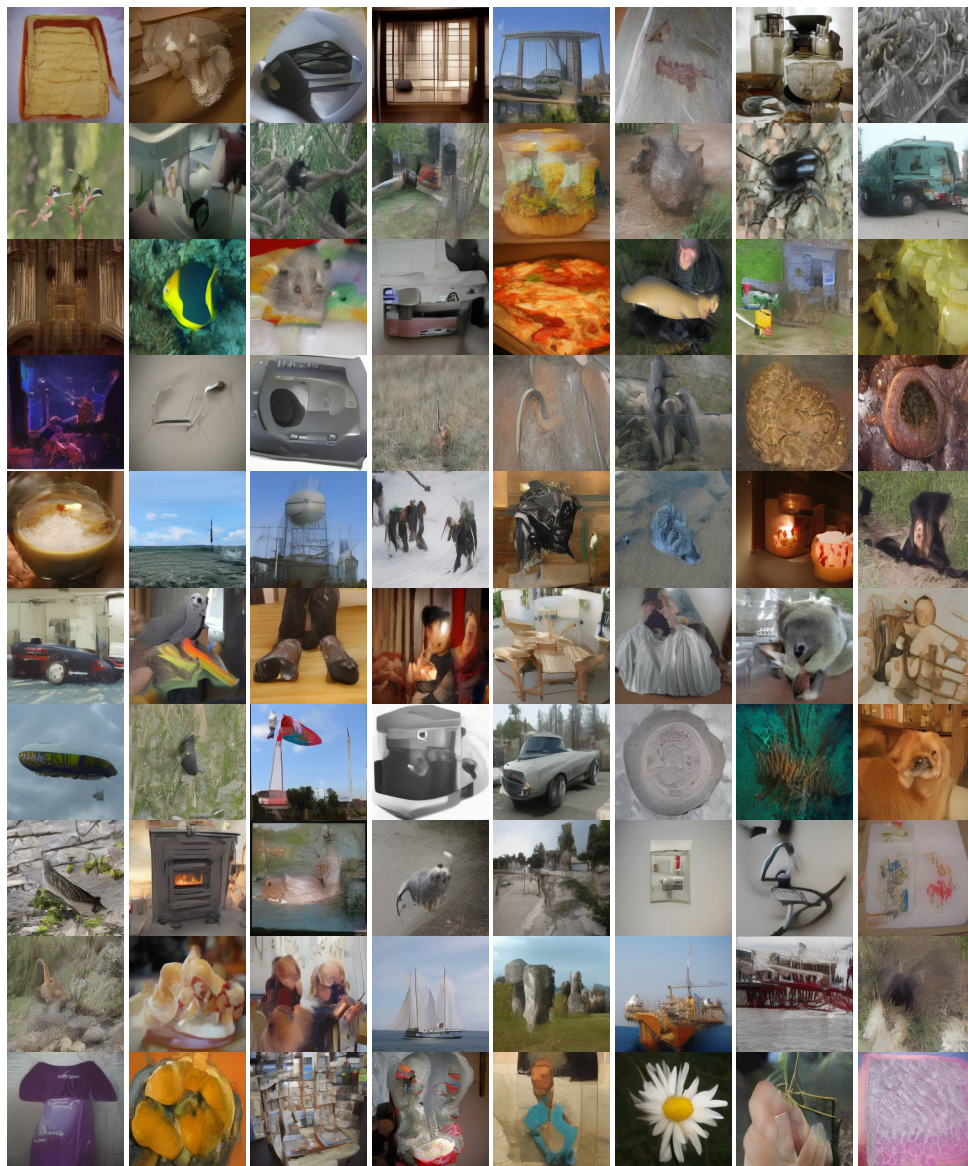

Figure 2: Unfiltered samples generated on the unconditional ImageNet dataset at a resolution of  $256 \times 256$ . These images were produced in a single forward pass using a DiT-B model trained for 800,000 iterations.

|                                     |                                         |
|-------------------------------------|-----------------------------------------|
| Batch Size                          | 64 (CelebA-HQ), 256 (Imagenet)          |
| Training Steps                      | 400,000 (CelebA-HQ), 800,000 (Imagenet) |
| Latent Encoder                      | sd-vae-mse-ft                           |
| Latent Downsampling                 | 8 (256x256x3 to 32x32x4)                |
| Classifier Free Guidance            | 0 (CelebA-HQ), 1.5 (Imagenet)           |
| Class Dropout Probability           | 0 (CelebA-HQ), 0.1 (Imagenet)           |
| EMA Parameters Used For Evaluation? | Yes                                     |
| EMA Ratio                           | 0.999                                   |
| Optimizer                           | AdamW                                   |
| Learning Rate                       | 0.00004                                 |
| Weight Decay                        | 0.0                                     |
| Hidden Size                         | 768                                     |
| Patch Size                          | 2                                       |
| Number of Layers                    | 12                                      |
| Attention Heads                     | 12                                      |
| MLP Hidden Size Ratio               | 4                                       |
| Basis                               | Polynomial                              |
| Basis order                         | 8                                       |

Table 2: Default hyperparameter settings used during training.

- 23 [2] Louis De Branges. The stone-weierstrass theorem. *Proceedings of the American Mathematical*  
24 *Society*, 10(5):822–824, 1959.
- 25 [3] Jonathan Ho and Tim Salimans. Classifier-free diffusion guidance. *arXiv preprint*  
26 *arXiv:2207.12598*, 2022.
